# Supplementary material
Source: Springer Nature journal article supplement (https://www.springermedizin.de/resource/supplementary/12974_2011_398_MOESM2_ESM.pdf/9601592)

A

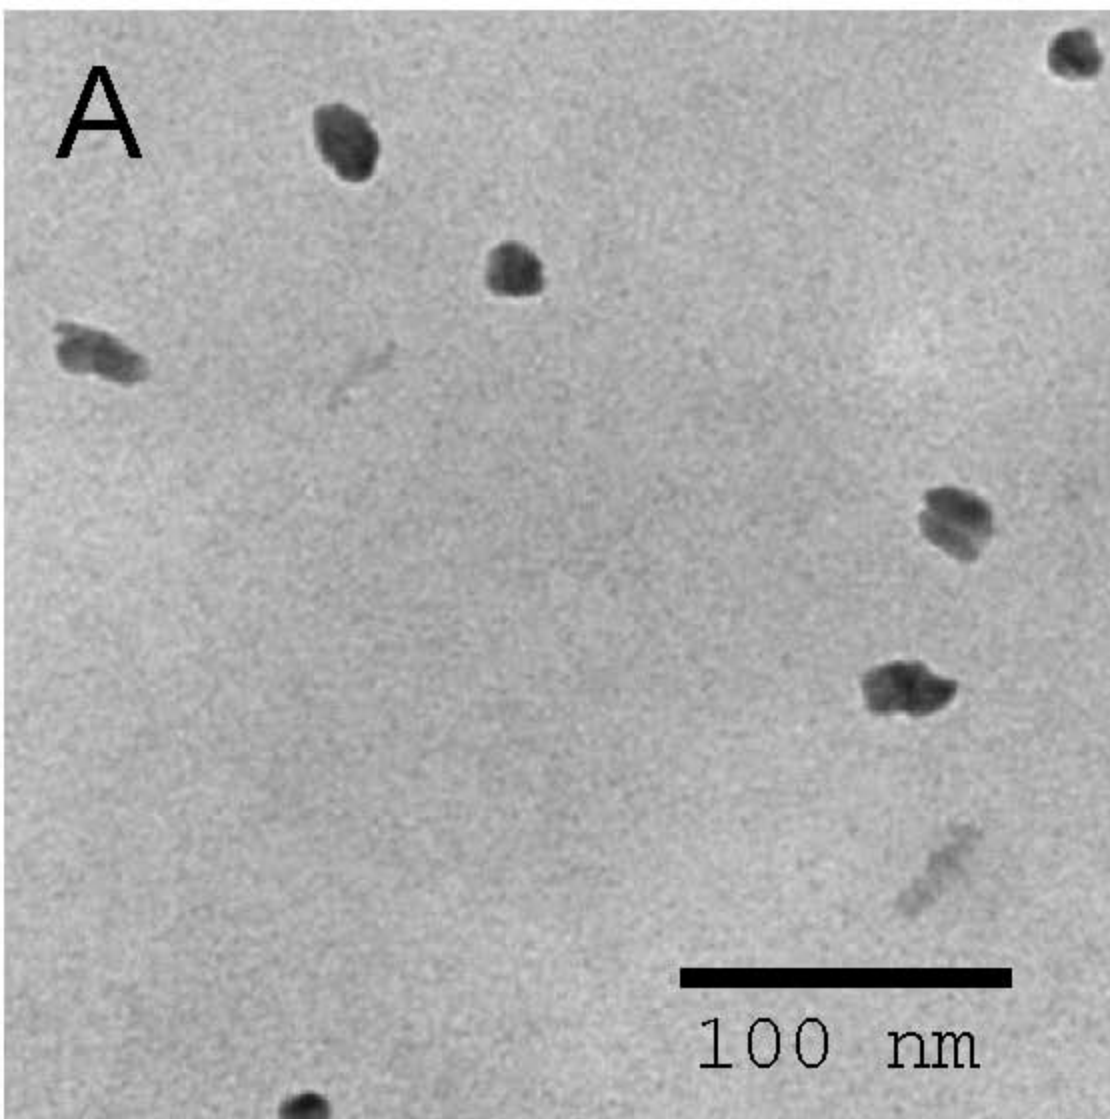

100 nm

B

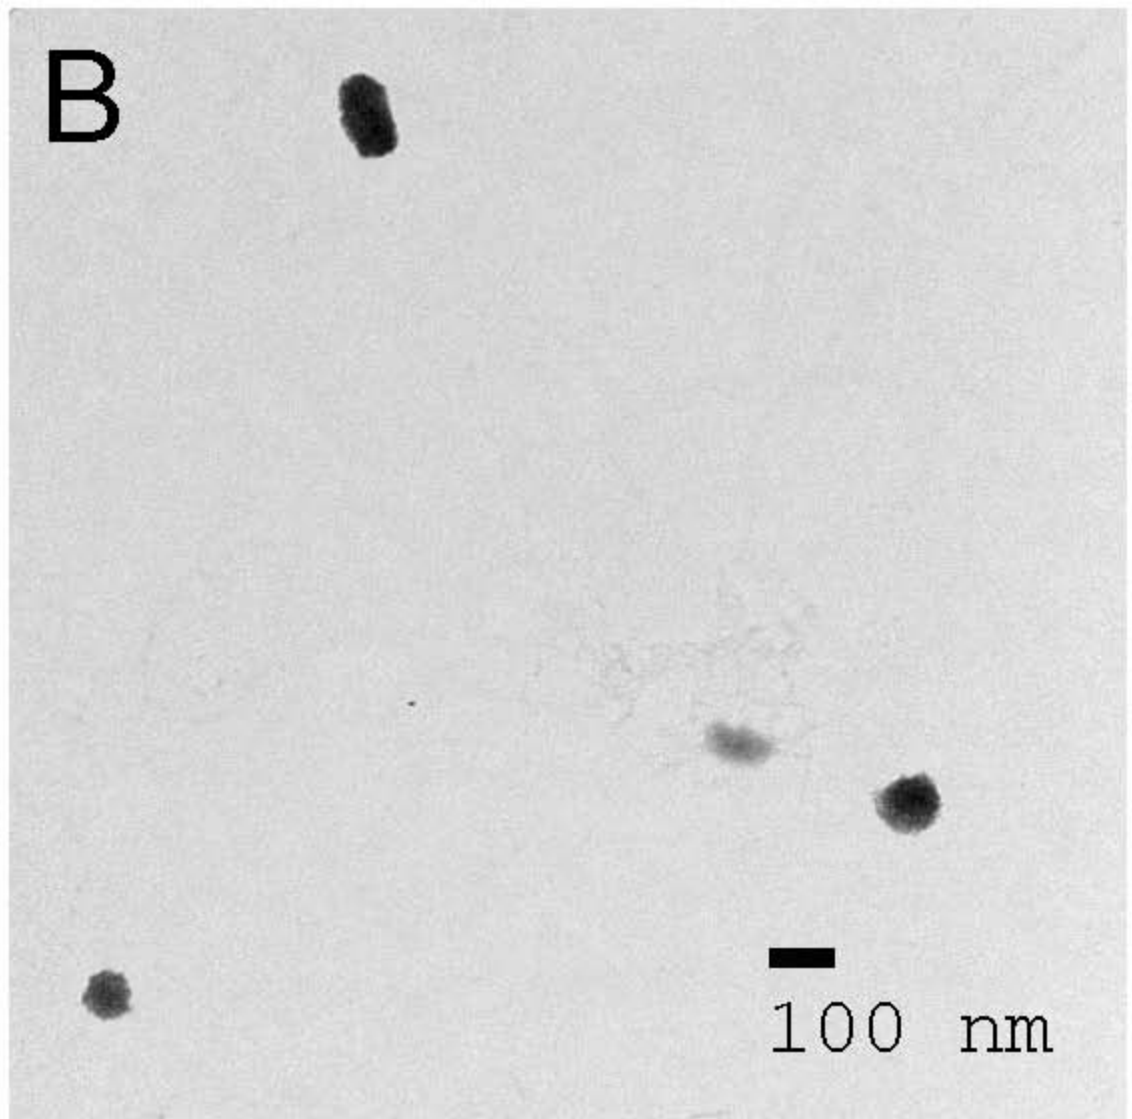

100 nm

Supplement: MOESM2 [file 9601592]
